# Supplementary material for: Local Neutral Networks Help Maintain Inaccurately Replicating Ribozymes
Source: PLoS One. 2014 Oct 9;9(10):e109987. doi: 10.1371/journal.pone.0109987 (PMC4192543; doi:10.1371/journal.pone.0109987)
Supplement: Table S1 — Error threshold of real ribozymes and aptamers. RNA sequences of ribozymes and aptamers from the literature is listed alongside their length, number of 1-neighbour neutral mutants, frequency of nearest-neighbour (one-step) neutral mutants (), the estimated error threshold and the citation for the sequence. Stabilizing selection was applied to selected sequences, and the highest number of 1-neighbour neutral mutants is reported here. (XLSX) [file pone.0109987.s001.xlsx]

## Sheet: Aptamers&Ribozymes
Sequence	Length	1-neighbour neutral mutants	Lambda	ErrorThreshold	Source	1-neighbour neutral mutants after stabilizing selection
ACCCTCACTAAAGGCCGTGGUGUCAUCAUAAUGGCACCCUUCAAGGACAUCGUCCGGGGGTTGCACACCTTTC	73	93	0.424658	0.86585	[1]	99
GGAGAATTCCGACCAGAGGCTTGGAGAATTCCGACCAGAGGTTATTAACTGCGAGTTGTTTTGACTCCAATGATACGGGGAGCGTTAGAGTCTTATGACCTTGTTCTCCACGTCATCCAAGTCACTCACGTCATAGCAGTCGGATCCTGTACATATGTGCGTCTACATGGATCCTCATGAGGATCCATGTAGACGCACATATG	203	150	0.246305	0.962224	[10]	170
GGAGAATTCCGACCAGAGGCTTGAGTGTGGTAATGGCGTTCCCAAATTCGGGCTGGGAACCATTCGTTCATATTATGCCCGTAGATATAGCAAGTCACAAATACTCAGTACTACACTCTTGTGGTCAGTCACATATGTGCGTCTACATGGATCCTCAGGGAGAATTCCGACCAGAGGCTTACATGAGGATCCATGTAGACGCACATATG	209	160	0.255183	0.962856	[10]
GAGTGTGCGTAATGGCGTTCCCAAATTCGGGCTGGGAACCGTTCGTTCGTGTTATGCCCGTAGATATGGCAGTCGCGGATGCTCAGTACTACACTCTTGTGGTCAGTCACTAATGTGCGTCTACATGGATCCTCAGGGAGAATCCGACCAGAGGCTTACA	160	133	0.277083	0.950223	[11]	167
GGGAGAATTCCGACCAGAGGTTGTTAAGTGCGAGTTGTTTTCTCCGATGATACGGGGAGCGTTAGAGTCTTATGACCTTGTTACTCCACGTCACTGTCCAAGTCACTCCGCGTCCATAGCAGTCGGATCCTGTACATATGTGCGTCTACATGGATCCTCA	160	98	0.204167	0.954784	[11]
GGGAATGGATCCACATCTACGAATTCATCAGGGCTAAAGAGTGCAGAGTTACTTAGTTCACTGCAGACTTGACGAAGCTT	80	49	0.204167	0.911195	[12]
GGGAATGGATCCACATCTACGAATTCGGTGATCATGGCAGTGTACGCGGGCGGACATTCACTGCAGACTTGACGAAGCTT	80	65	0.270833	0.903076	[12]	86
GGGAATGGATCCACATCTACGAATTCGAACAGGCUGUUUUGGACAUUGCACUACCGTTCACTGCAGACTTGACGAAGCTT	80	91	0.379167	0.886163	[13]	99
GCCTGTTGTGAGCCTCCTCCCAGAGGGAAGACTTTAGGTTCGGTTCACGTCCCGCTTATTCTTGTCTCCC	70	91	0.433333	0.858199	[14]	92
GGAGCTTAGACAACAGCAGCGTGCAGCGTGCAGGTGGGTAAAGGGGTGTGATCGAGGGTCGAGAGGCACGCTGCACGCTCAGGTGAGTCGGTTCCAC	97	87	0.298969	0.916325	[15]	97
GGAGCTTAGACAACAGCAGCGTGCAGCGTGCAGGTGGGTAAAGGGGTGTGATCGAGGGTCGTGAGGCACGCTGCACGCTCAGGTGAGTCGGTTCCAC	97	71	0.243986	0.92241	[15]
GGGAGAAUUCCGACCAGAAGCUUCGGGAUUUGAGGGUAGAAUGGGACUACCUUUCCUCUCUCCUUCCUCUUCU	73	52	0.237443	0.898785	[16]	91
GGGAGAAUUCCGACCAGAAGUGCUCUUAGAAUGGGACUAAGACACGGGACCCUUUCCUCUCUCCUUCCUCUUCU	74	95	0.427928	0.866835	[16]	91
GGGAGAAUUCCGACCAGAAGUACGACACGAUUGGGACGUGUCUAUGGGACCCUUUCCUCUCUCCUUCCUCUUCU	74	101	0.454955	0.860231	[16]	92
GGGAGAGCCATACCTGACTGCCTCTCTGTTTTCGTGTTTCAGTGTGCAACTACATGGCAGTTGGCTTCAGGCCTAAGGCGGGAGGTCCCAGGTTACTCATCCTCCCCCATCCCGGATGTCGTTCCGTGGCTTAACAGGGCGACCGGAACAGAGTTATCAAGAAACACGACACGCGTCAGTCGTCAGGATCCGTG	194	151	0.25945	0.959796	[17]	226
GGGAGAATTCCGACCAGAAGCTTGUGAGACCAGCCGAGUGGUGUCUGGCUAUUCACUGGAGCGUGGGUGGAACCCCUGCGCACUCGUUUGGCUGUCCGGGCCUUCGGGCCGGGAUUAUCUCUCATATGTGCGTCTACATGGATCCTCA	148	98	0.220721	0.950153	[18]	146
GGGAGAATTCCGACCAGAAGCTTGUGAGACCAGCCGAGUGGUGUCUGGCUAUUCACUGGAGCGUGGGUGGAACCCCUGCGCACUCGUUUGGCUGUCCGGCCUUCGGGCCGGGAUUAUCUCUUUGGGUUUUGUGAUUUGGUCATATGTGCGTCTACATGGATCCTCA	166	112	0.2249	0.955223	[18]	178
GGGCGAAUUCAGGACUCCUGACAUGUAGUUGAUUGAAGGGACGUUUGAUUCUUAUGAAUUGUGGAAAGCUUCG	73	42	0.191781	0.904503	[19]	84
CGAATTCAGGACTCCUGACAUCCUCUGAUACGUGGAAGAAACUGCGAACUCCUAGUUCGGACGTCATCAGTGCGCAGGATCCATC	85	81	0.317647	0.902311	[19]	95
GGGAGATACCAGCTTATTCAATTCTGCTGGTGACGAGGGCTAGACGACGTACCAGATAGTAAGTGCAATCT	71	53	0.248826	0.894474	[2]	93
GGGAGATACCAGCTTATTCAATTTACGAGTGTTGTAGATACCCGGTGCTACGGTGGAGTGGGGAAGCATGCGGTTATACTACTGACGCTTTTGTAGATAGTAAGTGCAATCT	112	76	0.22619	0.934083	[2]	89
AUGAUAAACCGAUGCUGGGCGAUUCUCCUGAAGUAGGGGAAGAGUUGUCAUGUAUGGG	58	65	0.373563	0.846505	[20]
AUGAUAAACCGAUGCUGGGCGAUUCUCCUGAAGUAGGGGAAGAGUUGUCAUGUAUGGG	58	65	0.373563	0.846505	[20]	72
GGGAATGGATCCACATCTACGAATTCGGUUGGGUUGUCGUAGAUAGAGCGCUUCAATTCACTGCAGACTTGACGAAGCTT	80	70	0.291667	0.900225	[21]	87
ACCTCAGAGAGTGGCCAAACAGTTCGGGGGAAGATGCCGTGTAGTATGGCCAGGGGAAGTATAGCTGCCGCGACACGATGTCCCGAGCCAGCAACCCAGTGATCTTATTGAGGTGATCACCAGTGTCTACATTCGATGTATGACGCGTTGGGAAGAAACTCTGGCACCGTTGCCGACTAGGGTGGCCATTAATACCTCAGGCCCACCGAAGCATGGGGACACCAGTGTCGCCGATCGACCATACTTCCCGAGACCGTATAGCCTGTC	267	215	0.268414	0.970309	[22]	267
TGGGTACCGTCGACATCCGAATGCCCGACAUAUCUCAACCACCCCACAAGGAUUGCUAGACUGCGAAGGCTAGCGAGCTCCAATTCGCCC	90	107	0.396296	0.895521	[23]	99
GGGUUGCACACACGUCUCGGGGGGGGGCGAGACGUGUGCAACCC	44	33	0.25	0.833645	[24]	46
GGGUUGCACACACGUCUCGAGGGACGGGCAGGGCUGGGCGAGACGUGUGCAACCC	55	38	0.230303	0.868617	[24]	54
GAATTGTGGTGTTGGCTCCCTATAGTGAGTCGTATTAGAAGCTTCGGTTTCATAGATACAUUCCAAAUUACCCACCCACUGCUCCUAUCUGCTTGATTGCCGGATCCGTTTCAATAGAGATATAAAATTCTTTCATAG	138	116	0.280193	0.942207	[25]
GAATTGTGGTGTTGGCTCCCTATAGTGAGTCGTATTAGAAGCTTCGGTTTCATAGATUCACUCUAUACCUCAAACGAAGUUGCACAACCCCCTTGATTGCCGGATCCGTTTCAATAGAGATATAAAATTCTTTCATAG	138	120	0.289855	0.94142	[25]
GAATTGTGGTGTTGGCTCCCTATAGTGAGTCGTATTAGAAGCTTCGGTTTCATAGATCCCAUCUUAGUUCAAGCCCAAUCGUGAUACAUCCCTTGATTGCCGGATCCGTTTCAATAGAGATATAAAATTCTTTCATAG	138	125	0.301932	0.940407	[25]	195
GAATTGTGGTGTTGGCTCCCTATAGTGAGTCGTATTAGAAGCTTCGGTTTCATAGATACAUUCCAAAUUACCCACCCACUGCUCCUAUCUGCTTGATTGCCGGATCCGTTTCAATAGAGATATAAAATTCTTTCATAG	138	116	0.280193	0.942207	[25]
GAATTGTGGTGTTGGCTCCCTATAGTGAGTCGTATTAGAAGCTTCGGTTTCATAGATUUACCCCGCGCGCAUACACAUCAUAACAUACCACCTTGATTGCCGGATCCGTTTCAATAGAGATATAAAATTCTTTCATAG	138	101	0.243961	0.944976	[25]
GGGAATGGATCCACATCTACGAATTCAGGGGACGUAGCAAUGACUGAGAUGCUGGGTTCACTGCAGACTTGACGAAGCTT	80	46	0.191667	0.912569	[26]	98
GGGAATGGATCCACATCTACGAATTCATGCGAGCTGCAGACCCAGGATCACCGGGATTCACTGCAGACTTGACGAAGCTT	80	75	0.3125	0.897202	[27]
GGGAATGGATCCACATCTACGAATTCTCAAGCTGGCAGTCGCGAGCATCAGCCGCATTCACTGCAGACTTGACGAAGCTT	80	79	0.329167	0.894648	[27]
GGGAATGGATCCACATCTACGAATTCAAGTCGCGACCCGGAGGATCACCACGGGGTTTCACTGCAGACTTGACGAAGCTT	80	70	0.291667	0.900225	[27]
GGGAATGGATCCACATCTACGAATTCAAGACAGCAGCGCCCACAGTCACTGGGGAGTTCACTGCAGACTTGACGAAGCTT	80	77	0.320833	0.895941	[27]
GGGAATGGATCCACATCTACGAATTCGCGTCTGCAGGAGCTAAGCTTGGAAGTCACTTCACTGCAGACTTGACGAAGCTT	80	52	0.216667	0.909778	[27]
GGGAATGGATCCACATCTACGAATTCCACAGGGGGATTGCTTCCTCTAGACGGTCTTTCACTGCAGACTTGACGAAGCTT	80	71	0.295833	0.899635	[27]
GGGAATGGATCCACATCTACGAATTCTCCACCGTCAATTCGTGTCTGCCAAAAGTTTTCACTGCAGACTTGACGAAGCTT	80	78	0.325	0.895298	[27]	90
GGGAATGGATCCACATCTACGAATTCCTAGTCCGCGGTAACTGTTTCCAGGATTAATTCACTGCAGACTTGACGAAGCTT	80	61	0.254167	0.905242	[27]
GGGAGAATTCCGACCAGAAGCTTUCCCUGGCCCAAGAUCCUAAUAAAGUUUUUUCGGACCGGAGCGAAACCACUAUCCUCUUAAGCAAUCUGUCATATGTGCGTCTACATGGATCCTCA	119	68	0.190476	0.940607	[28]	124
GGGAGAATTCCGACCAGAAGCTTACUGUCCUCCCUUCAGAGAGCGCGGGACCCUUAACUUGGGGCCCACGAACAGCUUCAGUUCCGUCUCGGCGUCATATGTGCGTCTACATGGATCCTCA	121	102	0.280992	0.934209	[28]	143
GGGAGAGGAUACUACACGUGCAACCGAAGGACCUAUUCAGACCGCCCAUUGCAUGUAGCAGAAGCUUGGC	70	41	0.195238	0.900152	[29]	89
GGGAGAGGAUACUACACGUGGUAAACCGAAGUACUAGACUUGACCUAACACCAUUGCAUGUAGCAGAAGCUUGGC	75	76	0.337778	0.886437	[29]	97
GCATGCTAATACGACTCACTATAGGAGCUCAGCCGCUUAAAGCCUAAAACAUACCAGAUCGCCACCCGCGCUUUAAUCUGGAGAGGUGAAGAAUUCGACCACCUAGGCUGCACCACAAGCUU	122	115	0.314208	0.931574	[3]	147
GGGGAGUACGGGAGAGGAUACUACACGUGUCCAUCCACCGUUGUGAUCGUCUGAAGUCAACCACAACAUGCCCUGACUCCCAUUGCAUGUAGCAGAAGCUUAAA	104	107	0.342949	0.916565	[30]	129
AGGGAAGTGCTACCACAACUUUAGCCAUAAUGUCACUUCUGCCGCGGGCAUGCGGCCAGCCA	62	47	0.252688	0.879247	[31]	81
AGGGAAGTGCTACCCCUGCCCGUUGACCGGGGUCUAUGGUAUCUUACUCAUAGUCGCCCAUUACCACAUAACACGGGCAUGCGGCCAGCCA	91	64	0.234432	0.918487	[31]
AGGGAAGUGCUACCAAAGCACCAUGAAGGGGACCUAUCCUGGGUCCAGUUCAAUCCCUGCCGGGCAUGCGGCCAGCCA	78	83	0.354701	0.887775	[32]
AGGGAAGUGCUACCAAAGCACCAUGAAGGGGACCUAUCCUGGGUCCAGUUCAAUCCCUGACGGGCAUGCGGCCAGCCA	78	91	0.388889	0.881497	[32]	100
AGGGAAGUGCUACCAAAGCACCAUGAAGGGGACCUAUCCUGGGUCCAGUUCAAUCCUUGCCGGGCAUGCGGCCAGCCA	78	79	0.337607	0.890671	[32]
AGGGAAGUGCUACCGUCACAAUCGACCAAAGCACCAUGAAGGGGACCUAUCCUGGGUCCAGUUCAAUCCCUGCCGGGCAUGCGGCCAGCCA	91	103	0.377289	0.899787	[32]
AGGGAAGUGCUACCGUCACAAUCGACCAAAGCACCAUGAAGGGGGCCUAUCCUGGGCCCAGUUCAAUCCCUGCCGGGCAUGCGGCCAGCCA	91	103	0.377289	0.899787	[32]	116
AGGGAAGUGCUACCAAAGCACCGUUAUAGGGGCCGAUAAUCGGCCAGUUUAAUCCCACACCGCAGUGCUCCGACGGGCAUGCGGCCAGCCA	91	131	0.479853	0.880027	[32]	115
GGGCCGGAGGUUAGCUUGCCCAUGGCAAGCAGGGCGCCACGGACCAGCCGAUGUCAACGCACAUCCAUAACCCAGAGGUCGAUGGAUCCCCCC	93	37	0.132616	0.929554	[33]	98
GGGAGAGGGCAACCUGACCUGUUAUGACG	29	47	0.54023	0.601836	[34]	54
GGGAGAGGGCAACCUGACCUGUUAUGAUUCCG	32	46	0.479167	0.678534	[35]	62
CTGACTCATGCAATGGAGCUCCGUCGAGGAACGAUGCAUCGAACAUAGAUUAGACAUCGUCGCUUCCCGTATCCTCTCCCGTACTCC	87	75	0.287356	0.908542	[36]	114
GGGCGAUGCCUGUCGAGCAUGCUGGCCACUACGUGCGGCCCCAUAGGACAGUAGCUAAACAGCUUUGAAUUCGAAA	76	38	0.166667	0.910898	[37]	82
GGGCGAUGCCUGUCGAGCAUGCUGUUCUGCCACUACGUGCGGCCCCAUAGGACAGUAGCUAAACAGCUUUGAAUUCGAAA	80	80	0.333333	0.893989	[37]	99
GGCGAGCGCAGUACGAUCGUCACACUGCGCCCUUCGUGUUAAGGGAGUAUUCAUUUUCCAGUCGUGACGGGGAGAGUAGCUGUUACGAUUGUUACUCCCGAGUCGGGGGCACCUGCC	117	107	0.304843	0.929683	[38]	125
GGCGAGCGCAGUACGAUCGUCACACUGCGCCCUUCGUGUUAAGGGAGUAUUCAUUUUCCAGUCGUGACGGGGAGAGUAGCUGUUACGAUUGUUACUCCCGAGUCGGGGGCACCUGCC	117	107	0.304843	0.929683	[38]
GGGGAGCTCGGTACCGAATTCAAGGNACUCUGUGCUUGUCGAUGUGNAUUGAUGGCACUUUCGAUCAACGAGUUGACAGNACAAGUAGUCAAGGATCCTCTGCAAAGCTT	110	80	0.249221	0.930859	[39]	135
GGGGAGCTCGGTACCGAATTCGGUGCAGGUCACUUCGAUGAGUGUAAAGCACCAGGUAAGUGUCUUGGUAGAAUCGGAGUCGGUGACCGUUAAGGATCCTCTGCAAAGCTT	111	113	0.339339	0.922117	[39]
GGGGAGCTCGGTACCGAATTCGGUGCAGGUCACUUCGAUGAGUGUAAAGCACCAGGUAAGUGUCUUGGUAGAAUCGGAGUCGGUGACCGUUAAGGATCCTCTGCAAAGCTT	111	113	0.339339	0.922117	[39]	123
GGGAAAAGCGAATCATACACAAGAAGACGGCCGGGGAAACCCGAGGUCCGAUGUAACGCGCTCCGCCAGAGACCAACCGAGAA	83	89	0.35743	0.893851	[4]	99
GGGAGACAAGAATAAACGCTCAAGGGCGTGGTGGGTGGGGTACTAATAATGTGCGTTTGTTCGACAGGAGGCTCACAACAGGC	83	72	0.289157	0.904046	[40]
GGGAGACAAGAATAAACGCTCAATTGGGGTCTGCTCGGGATTGCGGAGAACGTGAATCTTTCGACAGGAGGCTCACAACAGGC	83	76	0.305221	0.901827	[40]	99
GGGAGCUUGAUCCCGGAAACGGUCGAUCGCUCCC	34	33	0.323529	0.765832	[41]	35
CGGAAGCTTCTGCTACATGCAATGGCAUAGCCUAGUGGAACCGGUUAAGUCCCCAGGGUUGCGACGUAAAGUUGGCACGTGTAGTATCCTCTCCCTATAGTGAGTCGTATTAGAATTCGC	120	99	0.275	0.934222	[42]	125
GGGAGAATTCCGACCAGAAGCUUAUCCGGAGCUUGACCCACUGGUCACCCCCTTTCCTCTCTCCTTCCTCTTCT	74	94	0.423423	0.867875	[43]	99
GGGGAGCTCGGTACCTATAGTGTGTTCAACGCTTAGATTGAGCCGGATTAAGGGTGTACTTTTGTCCGTTGTACGAGAAGCTTTGCAGAGGATCC	95	68	0.238596	0.921387	[44]	99
GGGGAGCTCGGTACCCGCGGAAGTACGACTGGGTACGTTTCCGGTAGCCGGTAGGAGTAGTCCGGGCCTCGCTTCCCGATATCCGTAAGCTTTGCAGAGGATCC	104	72	0.230769	0.928733	[44]	104
GGGAGUGGAGGAAUUCAUCGAGGCAUAUGUCGACUCCGUCUUCCUUCAAACCAGUUAUAAAUUGGUUUUAGCAUAUCAUAUGCCUUAGCGACAGCAAGCUUCUGC	105	111	0.352381	0.916134	[45]	138
GGAAGAGAUGGCGACUAAAACGACUUGUCGC	31	56	0.602151	0.566828	[46]	65
GGAAGAGAUGGCGACCCGACGCGUAAACGAAAC	33	63	0.636364	0.552315	[46]	80
GGAAGAGAUGGCGACCCGACGCGUAAACGAAACGCACAUUCCCCCACAGGAUAUGUGCUCGGGACGGUAAGCUUGGCAC	79	65	0.274262	0.901431	[46]
GGAAGAGAUGGCGACUAAAACGACUUGUCGCGUGCUGCCCGCCUGUUCGCUUUCUGCACCCCGGCGGUAAGCUUGGCAC	79	77	0.324895	0.894038	[46]	134
GGGAGAATTCCGACCAGAAGCTTCTTTTATCCTCCGGTATAATTCGTTTCTTCGGATTCCGCACATACAGCTCTCAAACCTTGGTTAACATGGTTGGTGATTTGAGTGTCTCATAGTCATCGGAATTAGCTCGGTTTGGTGACACATATGTGCGTCTACATGGATCCTCA	170	169	0.331373	0.949293	[47]	176
GGGACGACGAUGACACGAUAAACGUGCGCCCAUGGCGGACGUUGUGAUACAUUUGGUCAGGUACAACAAUAGGUUGACCGUAUGUGGGAGCAUACGCCGAUCACAUGACCA	111	85	0.255255	0.93091	[48]
GGGACGACGAUGACACGAUACAUGAGAGACAUAUGAUUCGUGAUGGGAGUCACUGGCGCAGUGGUGCCGGAAAUCCAACUACUUCUGAGGGGACAUACGCCGAUCACAUGACCA	114	68	0.19883	0.937423	[48]
GGGACGACGAUGACACGAUACUGCGUCUGCACGCAAACUGUGGUGGCGCGGGCAUGCCAGAAUUGUCAGGUUCAACAAGAUAAUUAGCGAUGGGAACAUACGCCGAUCACAUGACCA	117	86	0.245014	0.935255	[48]	132
GGGACGACGAUGACACGAUAGGCGUCAGGAGGUGUGCAGAGACCUCCAAUAAGCAUCCCUGCGGCCAGGUCUACAACAUAAUCUGGACGAGGAAGACGCAUACGCCGAUCACAUGACCA	119	126	0.352941	0.925695	[48]
GGGACGACGAUGACACGAUAAGUAGGCCGCGCAUCACACGUAGGCAUAAUACUGCGCAUUGCGAAAGGAGGCCACAGUCGUCAUCAGAGUGAAGCCAGGGCAUACGCCGAUCACAUGACCA	121	106	0.292011	0.933185	[48]
GGGACGACGAUGACACGAUAACAUAGGCAGGAAGCCUCAGUCAGGUUUCUAAGAUGCGGCCAUUGCAGUCAUCAACGGUUAUGAAUCGAGCCAUAGUUUGCAUACGCCGAUCACAUGACCA	121	139	0.38292	0.923342	[48]	173
TGGTCATGTGATCGGCGTATGCAUGAGAGACAUAUGAUUCGUGAUGGGAGUCACUGGCGCAGUGGUGCCGGAAAUCCAACUACUUCUGAGGGGAATCGTGTATCGTCGTCCCTATAGTGAGTCGTATTA	129	89	0.229974	0.942292	[48]
TGGTCATGTGATCGGCGTATGAGUAGGCCGCGCAUCACACGUAGGCAUAAUACUGCGCAUUGCGAAAGGAGGCCACAGUCGUCAUCAGAGUGAAGCCAGGGTATCGTGTATCGTCGTCCCTATAGTGAGTCGTATTA	137	82	0.199513	0.94766	[48]	143
GGGACGCGUGGUACCUCGAGAGGGAGUGAGAUGUUGAGGGAAUGAUUAAAACAGUUAGUUUCUAAAAGCUUCCGCGGGGAUC	82	87	0.353659	0.893228	[49]	116
GCCTGTTGTGAGCCTCCTGTCGAACUGCGAUCAGGGGUAAAUUUCCGCGCAGGCUCCACGCCGCTTGAGCGTTTATTCTTGTCTCCC	87	92	0.35249	0.899342	[5]	97
GGCAAGTAGGTAGCGTCGAACCGAUUGUGUUCCGGUAAUGAAACGAGUAAAAGAGCAAGTCGGTTAGA	68	61	0.29902	0.882141	[50]	87
GAATTCAGTCGGACAGCGAGCGCGCACCTACTGTGATGTAGAAGTCACAGCAAGGCCCGATGGACGAATATCGTCTCCC	79	99	0.417722	0.877145	[51]	109
GAATTCAGTCGGACAGCGAGCGCGCACCTACTGTGATGCAGAAGTCACAGCAAGGCCCGATGGACGAATATCGTCTCCC	79	99	0.417722	0.877145	[51]
GAATTCAGTCGGACAGCGAGCGCGCACCTACTGTGATGAAGAAGTCACAGCAAGGCCCGATGGACGAATATCGTCTCCC	79	99	0.417722	0.877145	[51]
TCGGGCGAGTCGTCTGACCGAAAAAGACCUGACUUCUAUACUAAGUCUACGUUCCCCGCATCGTCCTCCC	70	77	0.366667	0.873126	[52]	111
TCGGGCGAGTCGTCTGAUCAGCCAUGUUUACGUCACUCCUUGUCAAUCCUCAUCGGCCGCATCGTCCTCCC	71	71	0.333333	0.881098	[52]	99
TAATACGACTCACTATAGGGAAGCTTGTACAGGGGGCAGUCAACUCGUGCGAUCGUGAAAACGGGGCAAGAUGGCCUUACAGCGGUCAAUACGGGGGUCAUCAGAUAGGGAGGCCUCCUGGUGGTCCGTTCGGGATCCTCA	141	110	0.260047	0.944952	[53]	153
CGGAAGCTTCTGCTACATGCAATGGATAGGACGATTATCGAAAATCACCAGATTGGACCCTGGTTAACGATCACGTGTAGTATCCTCTCCC	91	68	0.249084	0.916897	[54]
GGGAGACAAGAATAAACGCTCAAGAACTGAGGTGCTTTCCCAAAACCTTTCGACAGGAGGCTCACAACAGGC	72	69	0.319444	0.885077	[55]	98
TAATACGACTCACTATAGGGACACAATGGACGAAGUCAGUCGCAUUGGCCGAGCUGUCGCUCUGACCAACUGATAACGGCCGACATGAGAG	91	64	0.234432	0.918487	[56]
TAATACGACTCACTATAGGGACACAATGGACGAAGCCAGUCGCAUUGGCCGAGCUGUCGCUCUGACCAACUGGTAACGGCCGACATGAGAG	91	88	0.322344	0.907913	[56]	97
TAATACGACTCACTATAGGGACACAATGGACGCACCUCCGACGCACAGUCGCAGGCUCGAAAGAGACUAAAUGCTAACGGCCGACATGAGAG	92	97	0.351449	0.904793	[56]	99
GGTATTGAGGGTCGCATCTCAAAAGGGGTGATTGCTTGCACAATGACAGGGTAGGACAGATGGCTCTAACTCTCCTCT	78	79	0.337607	0.890671	[57]	92
ATAGGAGTCGACCGACCAGAACATGCGCCTTCCCCCTGTGGTTGGTGTCAGTCGGCCTGTGTATGTGCGTCTACATCCTAGACTCAT	87	51	0.195402	0.918994	[58]	102
ATAGGAGTCGACCGACCAGAACATGCGCCTTCCCCCTGTGGTTGGTGTCAGTCGGCCTGTGTATGTGCGTCTACATCCTAGACTCAT	87	51	0.195402	0.918994	[58]
ATAGGAGTCGACCGACCAGAACATGCGCCTTCCCCCTGTGGTTGGTGTCAGCCGGCCTGTGTATGTGCGTCTACATCCTAGACTCAT	88	83	0.318008	0.905482	[58]
CGCGTTGTGTTTACGCGTCTGATGAGTGTAAGGCGAGACCATTCCATGGAGTACCGATTCAGCAGGCACGAAACTACCTCGAGACGT	87	49	0.187739	0.919759	[59]
CGCGTTGTGTTTACGCGTCTGATGAGTAAGGCAAGACCGCTATGAGCGGAGTACCGTCATTGGTGTTACGAAACTACCTCGAGACGT	87	52	0.199234	0.918607	[59]	115
CGCGTTGTGTTTACGCGTCTGATGAGTCGTGAGTGAGGGCTAACATGTGTCTAGCTACAGTATTTACACGAAACTACCTCGAGACGT	87	49	0.187739	0.919759	[59]
GCGGTATGTAGGGAATAGCACTTTTTTTGCGTATACCTACACCGCAGCG	49	60	0.408163	0.809435	[6]	72
GCGCGGGAATAGTATGGAAGGATACGTATACCGTGCAATCCAGGGCAACG	50	68	0.453333	0.797578	[6]
GAUACGCAUCUUAAUAGGAAUGCUGUAUAGUGGUGGGGAGCUAUGCCUGCGCACGCCUUUGUCAGUCGUCAGGAUCCGUG	80	60	0.25	0.905768	[60]	86
AAAGGCUGCGCUAGGUCCAUCCGGCUGUUCGUGACAUAACGGUUGAGAGCAAGCGAUGGUUCCGUCAGUCGUCAGGAUCCGUG	83	62	0.248996	0.909177	[60]	93
GGGAGAGCCAUACCUGACUAUUCGAAUUUCUGCGACAGUUAAGUGUGUGGCUCCCCGCGACGACUCGAAGGGGCGCAGGUUACGCAUCCUCG	92	80	0.289855	0.913051	[60]	104
GGGAGAGCCAUACCUGACCUUAUCGCACCCAUGAAUAAGGUGUUCUGUCACACUAUCUUGGGCGCCAUGAUUCCUCAGGUUACGCAUCCCACGUAUCG	98	104	0.353741	0.910132	[60]	107
GGTGGTATCCCAAGGGTACGGGACCGGATCATTCGAGATTCGAATCCTCGTACCGCAGCCA	61	60	0.327869	0.863643	[61]	68
GGTGGTATCCCCAAGGGTACGGGACCGGATCATTCGAGATTCGAATCCTCGTACCGCAGCCA	62	59	0.317204	0.867837	[61]
GGTGGTATCCCCAAGGGTACGGGACCGGATCATTCGAGATTCGAATCCTCGTACCGCAGCCA	62	59	0.317204	0.867837	[61]	66
GGTGGTATCCCCAAGGGTACGGGACCGGATCATTCGAGATTCGAATCCTCGTACCGCAGCCA	62	59	0.317204	0.867837	[61]
GGTGGTATCCCCAAGGGTACGGGACCGGATCATTCGAGATTCGAATCCTCGTACCGCAGCCA	62	59	0.317204	0.867837	[61]
GGTGGTATCCCCAAGGGTACGGGATCGGATCATTCGAGATTCGAATCCTCGTACCGCAGCCA	62	54	0.290323	0.872843	[61]
GGTGGTATCCCCAAGGGTACGGGACCGGATCATTCGAGATTCGAATCCTCGTACCGCAGCCA	62	59	0.317204	0.867837	[61]
GGTGGTATCCCCAAGGGTACGGGACCGGATCATTCGAGATTCGAATCCTCGTACCGCAGCCA	62	59	0.317204	0.867837	[61]
GGTGGTATCCTCAAGGGTACGGGACCGGATCATTCTAGATTCGAATCCTCGTACCGCAGCCA	62	58	0.311828	0.86887	[61]
GGTGGTATCCCCAAGGGTACGGGACCGGATTCATTCGAGATTCGAATCCTCGTACCGCAGCCA	63	41	0.216931	0.886506	[61]
GGTGGTATCCCCAAGGGTACGGGACCGGATTCATTCGAGATTCGAATCCTCGTACCGCAGCCA	63	41	0.216931	0.886506	[61]
GGATCGTCAGTGCATTGAGATTTCCGCAGCCCTTCTCACTAACGGTGGGTCATGGGTATTGGCGTTAGGTGCGGGATGCTACGCT	85	55	0.215686	0.915011	[61]	100
GGATCGTCAGTGCATTGAGATTTCCGCAGCCCTTCTCACTAACGGTGGGTCATGGGTATTGGCGTTAGGTGCGGGATGCTACTACGCT	88	57	0.215909	0.917789	[61]	116
GGATCGTCAGTGCATTGAGATTTCCGCAGCCCTTCTCACTAACGGTGGGTCATGGGTATTGGCGTTAGGTGCGGGATACTACTACGCT	88	51	0.193182	0.920105	[61]
GGATCGTCAGTGCATTGAGATTTCCGCAGCCCTTCTCACTAACGGTGGGTCATGGGTATTGGCGTTAGGTGCGGGATGCTACTACGCT	88	57	0.215909	0.917789	[61]
GGATCGTCAGTGCATTGAGATTTCCGCAGCCCCTCTCACTAACGGTGGGTCATGGGTATTGGCGTTAGGTGCGGGATGCTACTACGCT	88	54	0.204545	0.918964	[61]
GGATCGTCAGTGCATTGAGATTTCCGCAGCCCTTCTCACTAACGGTAGGTCATGGGTATTGGCGTTAGGTGCGGGATGCTACTACGCT	88	24	0.0909091	0.929093	[61]
GGATCGTCAGTGCATTGAGATTTCCGCAGCCCTTCTCACTAACGGTGGGTCATGGGTATTGGCGTTAGGTGCGGGATGCTACTACGCT	88	57	0.215909	0.917789	[61]
GGATCGTCAGTGCATTGAGATTTCCGCAGCCCTTCTCACTAACGGTGGGTTCATGGGTATTGGCGTTAGGTGCGGGATGCTACTACGCT	89	53	0.198502	0.920449	[61]
GGATCGTCAGTGCATTGAGATTTCCGCAGGCCCTTCTCACTAACGGTGGGTCATGGGTATTGGCGTTAGGTGCGGGATGCTACTACGCT	89	68	0.254682	0.914453	[61]	112
GGATCGTCAGTGCATTGAGATTTCCGCAGGCCCTTCTCACTAACGGTGGGTCATGGGTATTGGCGTTAGGTGCGGGATGCTACTACGCT	89	68	0.254682	0.914453	[61]
GGATCGTCAGTGCATTGAGATTTCCGCAGCCCTTCTCACTAACGGTGGGTTCATGGGTATTGGCGTTAGGTGCGGGATGCTACTACGCT	89	53	0.198502	0.920449	[61]
AGGGAGAGACAAGCTTGGGTCGATGTCTCAGCTCGGCGGCGTGGTGAGGTGTGGTGTTGCGAGAAGAGAAAGAGAAGTTAATTAAGGATCCTCA	94	49	0.173759	0.926809	[62]	98
GGGCGAGGCCGTGCCAGCTCTTCGGAGCAATACTCGGC	38	39	0.342105	0.782655	[63]	70
GGAGCTGCGTTCGGCGAGGCCGTGCCAGCTCTTCGGAGCAATACTCGGC	49	40	0.272109	0.845055	[63]	59
GGAGCTCAGCCTTCACTGCGAGTCCGTGCCAGCTATCAATAGCAATACTCGGA	53	58	0.36478	0.835122	[63]	88
GGAGCTCAGCCTTCGGGCTGAGGCCGTGCCAGCTACCTTCGGGTAGCAATACTCGGC	57	65	0.380117	0.842299	[63]	75
GGGAGAGCCATACCTGACAAAGACGCUAGCGAAUUGGUUCCUCACUCAAAAGUAGGGGAAAGCGUUAUUAAGAAACCAAAAUUUGACAGGUUACGCAUCCUGCAUCCUCCAGGTTACGCATCCN66GTCAGTCGTCAGGATCCGTG	146	158	0.368298	0.937683	[64]	199
GGGAGAGCCATACCTGACCCGGGTTTGTCTGACAGGGATGGCTTAGGACTGCTGGCGAGCCAATCTAGTTCCATTTCCGGATGTTTACGGGTACGCCAGTCGAGCTCCTGAAGGCGTTTAGCTTGGATTCACCAATGAACAGTAGAATCATCCAGGTTACGCATCC	166	137	0.2751	0.952122	[65]	158
GGGAGAGCCATACCTGACCCGGGTTTGTCTGACAGGGATGGCTTAAGGACTGCTGGCGAGCCAATCTAGTTCCATTTCCGGATGTTTACGGGTTCGCCAGTCGAGCCCTGAAGGCGTTTAAGCTTGGATTACCAATATGAACAGTAGAATCATCCAGGTTACGCATCC	168	184	0.365079	0.945977	[65]	188
GGGAGAGCCATACCTGACCCGGGTTTGTCTGACAGGGATGGCTTAAGGACTGCTGGCGAGCCAATCTAGTTCCATTTCCGGATGTTTACGGGTACGCCAGTTGATCCTGAAGGCGTTTAAGCTTGGATTCACCAATATGAACAGTAGAATCATCCAGGTTACGCATCC	168	173	0.343254	0.947772	[65]
GGGAGAGCCATACCTGACCCGGGTTTGTCTGACAGGGATGGCTTAAGGACTGCTGGCGAGCCAATCTAGTTCCATTTCGGTATGTTTACGGGTACGCCAGTCGAGCTCCTGAAGGCGTTTAAGCTTGGATTCACCAATACGAACAGTAGATCATCCAGGTTACGCATCC	169	167	0.329389	0.949149	[65]
GGGAGAGCCATACCTGACCCGGGTTTGTCTGACAGGGATGGCTTAAGGACTGCTGGCGAGCCAATCTAGTTCCATTTCCGGATGTTTACGGGTACGCCAGTCGAGCTCCTGAAGGCGTTTAAGCTTGGATTCACCAATATGAACAGTAGATCATCCAGGTTACGCATCC	169	153	0.301775	0.95116	[65]
GGGAGAGCCATACCTGACCCGGGTTTGTTTGACAGGGATCGGTTAAGGACTGCTGGCGAGCCAATCTAGTTCCATTTCCGGATGTTTACGGGTACGCCAGTCGAGCTCCTGAAGGCGTTTAAGCTTGGATTCACAATATGAACAGTAGAATCATCCAGGTTACGCATCC	169	172	0.33925	0.94839	[65]
GGGAGAGCCATACCTGACCCGGGTTTGTCTGACAGGGATGGCTTAAGGACTGCTGGCTAGCCAATCATGTTCCATTTCCGGATGTTTACGGGTACGCCAGTCGAGCTCCTGAAGGCGTTTAAGCTTGGATTCACCAATATGACAGTAGAATCATCCAGGTTACGCATCC	169	162	0.319527	0.949886	[65]
GGGAGAGCCATACCTGACCCGGGTTTGTCTGACAGGGATGGCTTAAGGACTGCTGGCGACGCAATCTAGTTCCATTTCCGGATGTTTACGGGTACGCAGTCGAGCTCCTGAAGGCGTTTAAGCTTGGATTCACCAATATGAACAGTAGAATCATCCAGGTTACGCATCC	169	185	0.364892	0.946307	[65]	176
GGGAGAGCCATACCTGACCCGGGTTTGTCTGACAGGAATGCGTTAAGGACTGCTGGCGAACCAATCTAGTTCCATTTCCGGATGTTACGGGTACGCCAGTCGAGCTCCTGAAGGCGTTTAAGCTTGGATTCACCAATTTGAACAGTAGAATCATCCAGGTTACGCATCC	169	117	0.230769	0.955669	[65]
GGGAGAGCCATACCTGACCCGGGTTTGTCTGACAGGAATGGCTTAAGGACTGCTGGCGAACCAATCTAGTTCCATTTCCGGATGTTTACGGGTACGCCAGTCAGCTCCTGAAGGCGTTTAAGCTTGGATTCACCAATATGAACAGTAGAATCATCCAGGTTACGCATCC	169	175	0.345168	0.947924	[65]
GGGAGAGCCATACCTGACCCGGGTTTGTCTGACAGGGATGGCTTAAGGACTGCTGGCGTGCCAATCTAGTTCCATTTCCGGATGTTTACGGGTACGCCAGTCGAGCTCCTGAAGGCGTTTAATCTTGGATTCACCAATATGAACAGTAGAATCATCCAGGTTACGCATCC	170	149	0.292157	0.952103	[65]
GGGAGAGCCATACCTGACCCGGGTTTGTCTGGCAGGGATGCGTTAAGGACTGCTGGCGAGCCAATCTAGTTCCATTTCCGGATGTTTACGGGTACGCCAGTCGAGCTCCTGAAGGCGTTTAAGCTTGGATTCACCAATATGAACAGTAGAATCATCCAGGTTACGCATCC	170	120	0.235294	0.955664	[65]
GGGAGAGCCATACCTGACCCGGGTTTGTCTGACAGGGATGGCTTAAGGACTGCTGGCGTGCCAATCTAGTTCCATTTCCGGATGTTTACGGGTACGCCAGTCGAGCTCCTGAAGGCGTTTAAGCTTGGATTCACCAATATGAACAGTAGAATCATCCAGGTTACGCATCC	170	168	0.329412	0.949442	[65]
GGGAGAGCCATACCTGACCCGGGTTTGTCTGACAGGGATGGCTTAAGGACTGCTGGCGAGCCAATCTAGTTCCATTTCCGGATGTTTACGGGTACGCCAGTCGAGCTCCTGAAGGCGTTTAAGCTTGGATTCACCAATATGAATAGTAGAATCATCCAGGTTACGCATCC	170	167	0.327451	0.949589	[65]
GGGAGAGCCATACCTGACCCGGGTTTGTCTGACAGGGATGGCTTAAGGACTGCTGGCGAGCCAATCTAGTTCCATTTCCGGATGTTTACGGGTACGCCAGTCGAGCTCCTGAAGGCGTTTAAGCTTGGATTCACCAATATGAACAGTAGAATCATCCAGGTTACGCATCC	170	168	0.329412	0.949442	[65]	182
GGGAGAGCCATACCTGACCCGGGTTTGTCTGACAGGGATGGCTTAAGGACTGCTGGCGAGCCAATCTAGTTCCATTTCCGGATGTTTACGGGTACGCCAGTCGAGCTCCTGAAGGCGTTTAAGCTTGGATTCACCAATATGAACAGTAGAATCATCCAGGTTACGCATCC	170	168	0.329412	0.949442	[65]
GGGAGAGCCATACCTGACCCGGGTTTGTCTGACAGGGATCGGTTAAGGACTGCTGGCGATCCAATCTAGTTCCATTTCCGGATGTTTACGGGTACGCCAGTCGAGCTCCTGAAGGCGTTTAAGCTTGGATTCACCAATATGAACAGTAGAATCATCCAGGTTACGCATCC	170	153	0.3	0.951566	[65]
GGGAGAGCCATACCTGACCCGGGTTTGTCTGACAGGGATGGCTTAAGGACTGCTGGCGAGCCAATCTAGTTCCATTTCCGGATGTTTACGGGTACGCCAGTCGAGCTCCTGAAGGCGTTTAAGCTTAGATTCACCAATATGAACAGTAGAATCATCCAGGTTACGCATCC	170	153	0.3	0.951566	[65]
GGGAGAGCCATACCTGACCCGGGTTTGTCTGACAGGGATGGCTTAAGGACTGCTGGCGAGCCAATCTAGTTCCATTTCCGGATGTTTACGGGTACGCCAGTCGAGCTCCTGAAGGCGTTTAAGCTTGGATTCACCAATATGAACAGTAGAATCATCCAGGTTACGCATCC	170	168	0.329412	0.949442	[65]
GGGAGAGCCATACCTGACCCGGGTTTGTCTGACAGGAATGCGTTAAGGACTGCTGGCGAACCAATCTAGTTCCATTTCCGGATGTTTACGGGTACGCCAGTCGAGCTCCTGAAGGCGTTTAAGTTTGGATTCACCAATATGAACAGTAGAATCATCCAGGTTACGCATCC	170	144	0.282353	0.952757	[65]
GGGAGAGCCATACCTGACGGGAGACCAUACCUGACCCGGGUUUGUCUGACAGGGAUGGCUUAAGGACUGCUGGCGUGCAAUCUAGUUCCAUUUCCGGAUGUUUCAGGUUACGCAUCCACGGGUACGCCAGUCGAGGUCCUGAAGGCGUUUAAGCUUGGAUUCACCGGUAUGAACAGUAGAAUCAUCGUCAGUCGUCAGGAUCCGUGCAGGTTACGCATCC	220	145	0.219697	0.966294	[65]	176
GGGCGACCCUGAUGAGCCUGGAUACCAGCCGAAAGGCCCUUGGCAGUUAGACGAAACGGUGAAAGCCCGUAGGUUGCCC	79	65	0.274262	0.901431	[66]	74
GGGAGAGACCUGCCAUUCACGCGCCCACUAUGAGAUGAUCCUGUUAGCAGACGGGCACAGAUGUGCCCCGUGCGCCAAGCAGCGUCAGGAUCCGUG	96	93	0.322917	0.91249	[67]	137
GGGAGAGACCUGCCAUUCACGCGCCCACUAUGAGAUGAUUCUGUUAGAUGUGUAGGAUCGAACCAAUCAGUUCGGCCCAAGCAGCGUCAGGAUCCGUG	98	105	0.357143	0.909656	[67]	124
GGGAGAGACCUGCCAUUCACGCACCCACUAUGAGAUGAUUCUGGUGACUUCUUCCUUCCGGGAGCACUUAGUCACCCGCCCCAAGCAGCGUCAGGAUCCGUG	102	96	0.313725	0.918596	[67]
GGGAGAGACCUGCCAUUCACGCGCCCACUAUGAGAUGAUUCUGGUGACUUCUUCCUUCCGGGAGUACUUAGUCACCCGCCCCAAGCAGCGUCAGGAUCCGUG	102	98	0.320261	0.917813	[67]	116
GGGAGAGACCUGCCAUUCACGUGCCCACUAUGAGAUGAUUCUGUUCAUGUGGUAUCGCGCCAUUGAAGCGGCACCACUGCUCUAAGCAGCGUCAGGAUCCGUG	103	60	0.194175	0.931327	[67]
GGGAGAGACCUGCCAUUCACGCGCCCACUAUGAGAUGAUUCUGAGAUGUGUAGGGAGCGCUUAACGUGACCGACACUUGCUCCAAGCAGCGUCAGGAUCCGUG	103	41	0.132686	0.936196	[67]
GGGAGAGACCUGCCAUUCACAUGCCCACUAUGAGAUGAUUCUGUUCAUGUGGUAUCGCGCCAUUGAAACGGCACCACUGCGCUAAGCAGCGUCAGGAUCCGUG	103	45	0.145631	0.935229	[67]
GGGAGAGACCUGCCAUUCACGCGCCCACUAUGAGAUGAUUCUGAGAUGUGUAGGGAGCGCUUAACGUGACCGACACUUGCUCCAAGCAGCGUCAGGAUCCGUG	103	41	0.132686	0.936196	[67]
GGGAGAGACCUGCCAUUCACGCGCCCACUAUGAGAUGAUUCUGGUGACUUCUUCCUUCCGGGAGUACUUAGUCACCCGCCCCAAAGCAGCGUCAGGAUCCGUG	103	104	0.33657	0.916588	[67]	114
GGGAGAGACCUGCCAUUCACACGCCCACUAUGAAAUGAUUCUGUUCAUGUGGUAUCGCGCCAUUGAAGCGGCACCACUGCUCUAAGCAGCGUCAGGAUCCGUG	103	63	0.203883	0.93049	[67]
GGGAGAGACCUGCCAUUCACGCGCCCACUAUGAGAUGAUUCUGAACCGUGGAAGUAAUGAUGAGCAGCCCGUCUCCAACUUCCGCCAAGCAGCGUCAGGAUCCGUG	106	67	0.210692	0.93182	[67]
GGGAGAGACCUGCCAUUCACGCGCCCACUAUGAGAUGAUUCUGUUAGAGCGCCUUCAGAACCGGUCUGGAGUCUAUUCCGGUCACCGUACGAAAGCAGCGUCAGGAUCCGUG	112	117	0.348214	0.921743	[67]
GGGAGAGACCUGCCAUUCACGCGCCCACUAUGAGAUGAUUCUGUUAGAGCGCCUUCAGAACCGGUCUGGAGUCUAUUCCGGUCACCGUACGAAAGCAGCGUCAGGAUCCGUG	112	117	0.348214	0.921743	[67]
GGGAGAGACCUGCCAUUCACACGUCCACUAUGAGAUGAUCCUGUUAGAGCGCCUUGCGCUGCCAUCGUUCUCACAACAAGCCCAGGGAUUGGCGUUGACAAGCAGCGUCAGGAUCCGUG	119	90	0.252101	0.935713	[67]	120
GGGAGAGACCUGCCAUUCACAAGCGAGUGUGCAGACACGAUACUUCUCCUGCCGGUGGACUCGUAAGAAUUGCUAGGGCUUGGCCAUGUGAGCAACGACUUACAAGCAGCGUCAGGAUCCGUG	123	129	0.349593	0.928424	[67]
GGGAGAGACCUGCCAUUCACAAGCGAGUGUGCAGACACGAUACUUCUGCCCGCCGGUGGAUUCGUAAGAAUUGCUAGGGCUUGGCCUUGUGAGCAACGACUUACAAGCAGCGUCAGGAUCCGUG	124	84	0.225806	0.940342	[67]
GGGAGAGACCUGCCAUUCACAAGCGAGUGUGCAGACACGAUACUUCUGCCCGCCGGUGGAUUCGUAAGAAUUGCUAGGGCUUGGCCACGUGAGCAACAACUUACAAGCAGCGUCAGGAUCCGUG	124	110	0.295699	0.934422	[67]
GGGAGAGACCUGCCAUUCACAAGCGAGUGUGCAGACACGAUACUUCUGCCCGCCGGUGGAUUCGUAAGAAUUGCUAGGGCUUGGCCAUGUGAGCAACGACUUACAAGCAGCGUCAGGAUCCGUG	124	112	0.301075	0.933917	[67]
GGGAGAGACCUGCCAUUCACAAGCGAGUGUGCAGACACGAUACUUCUGCCCGCCGGUGGAUUCGUAAGAAUUGCUAGGGCUUGGCCAUGUAAGCAACGACUUACAAGCAGCGUCAGGAUCCGUG	124	88	0.236559	0.939502	[67]
GGGAGAGACCUGCCAUUCACAAGCGAGUGUGCAGACACGAUACUUCUGCCCGCCGGUGGAUUCGUAAGAAUUGCUAGGGCUUGGCCCUGUGAGCAACGACUUACAAGCAGCGUCAGGAUCCGUG	124	122	0.327957	0.931274	[67]
GGGAGAGACCUGCCAUUCACAAACGAGUGUGCAGACACGAUACUUCUGCCCGCCGGUGGAUUCGUAAGAAUUGCUAGGGCUUGGCCAUGUGAGCAACGACUUACAAGCAGCGUCAGGAUCCGUG	124	124	0.333333	0.93072	[67]
GGGAGAGACCUGCCAUUCACCAACGAGUGUGCAGACACGAUACUUCUGCCCGCCGGUGGAUUUGUAAGAAUUGCUAGGGCUUAGCCAUGCGAGCAACGACUUACAAGCAGCGUCAGGAUCCGUG	124	128	0.344086	0.929584	[67]
GGGAGAGACCUGCCAUUCACAAGUGAGUGUGCAGACACGAUACUUCUGCCCGCCGGUGGAUUCGUAAGAAUUGCUAGGGCUUGGCCUUGUGAGCAACGACUUACAAGCAGCGUCAGGAUCCGUG	124	76	0.204301	0.941955	[67]
GGGAGAGACCUGCCAUUCACAAGCGAGUGUGCAGACACGAUACUUCUGCCCGCCGGUGGAUUCGUAAGAAUUGCUAGGGCUUGGCCCUGUGAGCAACAACUUACAAGCAGCGUCAGGAUCCGUG	124	122	0.327957	0.931274	[67]
GGGAGAGACCUGCCAUUCACCAACGAGUGUGCAGACACGAUACUUCUGCCCGCCGGUGGAUUCGUAAGAAUUGCUAGGGCUUGGCCCUGUGAGCAACGACUUACAAGCAGCGUCAGGAUCCGUG	124	136	0.365591	0.927197	[67]	145
GGGAGAGACCUGCCAUUCACAAGCGAGUGUGCAGACACGAUACUUCUGCCCGCCGGUGGAUUUGUAAGAAUUGCUAGGGCUUGGCCUUGCGAACAACGACUUACAAGCAGCGUCAGGAUCCGUG	124	111	0.298387	0.934171	[67]
GGGAGAGACCUGCCAUUCACAAGCGAGUGUGCAGACACGAUACUUCUGCCCGCCGGUGGGUUCGUAAGAAUUGCUAGGGCUUGGCCUUGUGAGUAACGACUUACAAGCAGCGUCAGGAUCCGUG	124	61	0.163978	0.944754	[67]
GGGAGAGACCUGCCAUUCACAAGCGAGUGUGCAGACACGAUACUUCUGCCCGCCGGUGGAUUCGUAAGAAUCGCUAGGGCUUGGCCAUGUGAGCAAUGACUUACAAGCAGCGUCAGGAUCCGUG	124	114	0.306452	0.933405	[67]
GGGAACTGTTGTGAGTCTCATGTCGAACUUUCCUAGCGCACAUGCGACCUCUAUGCGUAAUACGAACGUUGACGGUTTGAGCGTCTAGTCTTGTCT	96	67	0.232639	0.922785	[68]	99
GGAAGACGTAGCCAAAUGCAAUGCAUUUGAGAACUGUAAGUUGUAUGAGGGCAUGTACGGTCGCTGTCCTG	71	41	0.192488	0.901837	[69]
GGAAGACGTAGCCAAGGCGAUAGGUGAGUACACUGGGUCGGAGGGAUAGCUAGGUTACGGTCGCTGTCCTG	71	62	0.29108	0.888185	[69]	78
GAATTCCGCGTGTGCAGAACAAUCGCAUAGGCCGCAAGGUUAGUUUCGUUGUCCGCCCGGUGCAGTCCGTTCGGGATCCTC	81	61	0.251029	0.906762	[7]
GAATTCCGCGTGTGCACGAGUAUAGCCCACAUGGCACGACAGGGACGUUUCAUGUGCACAGUUGGTCCGTTCGGGATCCTC	81	48	0.197531	0.912978	[7]
GAATTCCGCGTGTGCAGAUCAGGACAGAGCGCACAGGUGCCAUCCUGGUCUAACGCCCUCGAUGGTCCGTTCGGGATCCTC	81	79	0.325103	0.896529	[7]	105
GAATTCCGCGTGTGCGAGGGGCGAGGACGCCGAGUAUAGCCCCUAGAGGUGGAUGUUUCACGGUGTCCGTTCGGGATCCTC	81	48	0.197531	0.912978	[7]
GAATTCCGCGTGTGCCAGCGAAAGUUGCGUAUGGGUCACAUCGCAGGCACAUGUCAUCUGGGCGGTCCGTTCGGGATCCTC	81	77	0.316872	0.897775	[7]
GAATTCCGCGTGTGCUUGAGAGGUCGUGCCAACUCUCAAGGUUGUCUUUGCUCUCCGCUCUGUGGTCCGTTCGGGATCCTC	81	59	0.242798	0.907776	[7]
TCTAATACGACTCACTATAGGGCGCTAAGTCCTCGCTCAGUGUUGUACGACAAACGGUGAGGCAGCUUCGGACGAUCCGTCGGATCCGAGTCGCGCGT	98	92	0.312925	0.91547	[70]
TCTAATACGACTCACTATAGGGCGCTAAGTCCTCGCTCAGUUGACUUGAAGCGGCGAGGCUGCCAAAGGUCCUUGGUCCGTCGGATCCGAGTCGCGCGT	99	96	0.323232	0.915024	[70]
TCTAATACGACTCACTATAGGGCGCTAAGTCCTCGCTCACGAUACAGCACUGAUUGCGGUCGAGGUAGCUUGAUGGGCCGTCGGATCCGAGTCGCGCGT	99	105	0.353535	0.911041	[70]	133
ACTCCTAGGTACATCTGCGTGTATACCUUCUCCUGCCGCGCGAUUUUACGCCGACAAGGGUGGCAUGAUGAUGUGUCUNUAUAUAGCGAAGACCAGCCTTAAGAGGG	107	70	0.220126	0.931623	[71]	108
CUACUAACAUUCUCUAAGGUAUCGGGUGUAUG	32	47	0.489583	0.671973	[72]	63
CUAUCCGGAGGACAAUAUAAUUAGAUCGGAAAAGGAAGGA	40	53	0.441667	0.755786	[72]	74
CUAUCCGAGGACAAUAUAUUAAAGAGCUCCCAUCCAGGGCC	41	62	0.504065	0.731297	[72]	98
CUUCCGAGGACAAUAUAUUAAAAUUGGGAAUGCCUCGGUCAUA	43	60	0.465116	0.761678	[72]	65
CUUCCGAGGACAAUCUAUUAAAAGCGAGAUUGGGGACUGUCUCGGCUCG	49	55	0.37415	0.819792	[72]	75
GGAAAUGCCCAACUGCUAAAUUAAUGCAUAGUCUAACCGCGUUCUCGGCACUUCCACCAUUGGAACGAUACAGAGAAGUUUAGCAUUGCCCCUCCGAAG	99	76	0.255892	0.922715	[72]	129
GGAAAUGCCCAACUGCUAAAUUAAUGCAUAGUCUAACCGCGUUCUCGGCACUUCCACCAUUGGAACGAUACAGAGAAGUUUAGCAUUGCCCCUCCGAAG	99	76	0.255892	0.922715	[72]
GGAAAUGCCCAACUGCUAAAUUAAUGCAUAGUCUAACCGCGUUCUCGGCACUUCCACCAUUGGAACGAUACAGAGAAGUUUAGCAUUGCCCCUCCGAAG	99	76	0.255892	0.922715	[72]
GGAAAUGCCCAACUGCUAAAUUAAUGCAUAGUCUAACCGCGUUCUCGGCACUUCCACCAUUGGAACGAUACAGAGAAGUUUAGCAUUGCCCCUCCGAAG	99	76	0.255892	0.922715	[72]
GGAAAUGCCCAACUGCUAAAUUAAUGCAUAGUCUAACCGCGUUCUCGGCACUUCCACCAUUGGAACGAUACAGAGAAGUUUAGCAUUGCCCCUCCGAAG	99	76	0.255892	0.922715	[72]
GAUGACACGCAAAUUCGUGAAGCGGCACCGCUUCUCGCCUUUUGGCUAAGGGAUCAAGUGUAGGUAUUCUGUUCUUAUCAGUUUAAUAUCUGAUACGUCCU	101	64	0.211221	0.928494	[72]
GAUGACACGCAAAUUUCGUGAAGCGGCACCGCUUCUCGCCUUUUGGCUAAGGGAUCAAGUGUAGGUAUUCUGUUCUUAUCAGUUUAAUAUCUGAUACGUCCU	102	81	0.264706	0.924023	[72]
GAUGACACGCAAAUUUCGUGAAGCGGCACCGCUUCUCGCCUUUUGGCUAAGGGAUCAAGUGUAGGUAUUCUGUUCUUAUCAGUUUAAUAUCUGAUACGUCCU	102	81	0.264706	0.924023	[72]	106
GAUGACACGCAAAUUUCGUGAAGCGGCACCGCUUCUCGCCUUUUGGCUAAGGGAUCAAGUGUAGGUAUUCUGUUCUUAUCAGUUUAAUAUCUGAUACGUCCU	102	81	0.264706	0.924023	[72]
GAUGACACGCAAAUUUCGUGAAGCGGCACCGCUUCUCGCCUUUUGGCUAAGGGAUCAAGUGUAGGUAUUCUGUUCUUAUCAGUUUAAUAUCUGAUACGUCCU	102	81	0.264706	0.924023	[72]
ACCGAGTCCAGAAGCTTGTAGTACTGCUUGUGGACCAAGAAGCAACCAGUCACCGUUGCCCCGCCTAGATGGCAGTTGAATTCTCCCTATAGTGAGTCGTATTAC	105	105	0.333333	0.91853	[73]	147
AACGTTGTTATTACTGTTCCTATTCTAGAATAACCTTGGCGGAATGGCAAGTAGGTTGCCGGATGATGAGAGACCTTCCTCACTCCGGTTGTCAGCACTGCTTGACTAAACGTCGGCACCTGCGCTTCTCCACTTTTCAAACCAAGTGGTCGTGCGATGAACATGGTCCTTCGTTCTTACGTATAGGACACTGGCACGCACATCGCAGCAAC	212	177	0.278302	0.962201	[74]	204
GGACCGAGAAGTTACCCGTGTGTTAGACATAAAGGTATGCGCAATCTATTTTCACTCCAACGAAGATACCACTTTAACCATACTAGGATAACCATGGCGGAAAGGCAAGCTGGTTGCCAATTGATGAGAGTCATCCGTCTCTCCGGTTGTCAGACCAGCTTGACTAAACGTCGGAACCTGCGCTACACCACTCTTCAACCCCAGTGGCAGTGCGTAGTACCAGGGTCCCTTGTTTTTACACATAGGACGCTGGCACGCACATCGCAGCAAC	271	225	0.276753	0.970405	[74]
GGACCGAGAAGTTACCCAAAACCTCAACAGGTCGCTTTGTGAGCCTGAAGTGAATTGGAAGCTCGCGAGAGCAAACTAGTTCGGTCTTGGATTCCTTGGGAGTCCTGCCTATTTAACCACTAAGTCAGTCACATGGAAACGCGATGGCTAGGTTGCGCGTTACTACAAAATTGGCACCAGATATACTGTAGAGTACTCGGGGAGTACTGAACGCCATAGTAAAGACAATAGGCCTCTATCAGCGATATGATGTTACGCACATCGCAGCAAC	271	228	0.280443	0.970253	[74]
GGACCGAGAAGTTACCCAAAACCTCAGCTGATCACTTTGTGAACCTGAAGTATCTGGAAGCTCGCGAGAGCAAATTAGTTCGGTCTTGAATTCCATGTGAATTCTGTCTATTTAACCTCTATATCAGTCGAGATGGAAACGCGGTGGCTAGGTTGCGCGTTTCCAATTAATTGGCACCGGATTTCCAGTAGGGAGATCTGGGGGTACTGAACGCCATAGTAGAGACAATAGGCCACCATCGGCGATGAGACGTAACGCACATCGCAGCAAC	271	293	0.360394	0.966535	[74]
GGACCGAGAAGTTACCCGAGTTCGTTAGATTTAAAGATACACCCTATCTTTTATCACTCCAGCGTTGGTACCACTGTACCTATACTAGGATACCCTCGGCGGAATGGCAAGCTGGTTACCAAATGCTGAGAGACATCCCTCTCTCCGGCTGTCAGCACGGCTTGACTAAACGTCGGCACCTGCGCTTCTCCACTTTTCTACCCAGTGGTAGTGCTATGTACCATGGTCCTTCGTTATTACACATAGGACTCTGGCACGCACATCGCAGCAAC	272	210	0.257353	0.971283	[74]
GGACCGAGAAGTTACCCAAAACCGCAACTGGTCACTATGTGAGCCAGAAGTGAATTGGAAGCTAGCGTGAGCAAACAAGTTCGATCTTGGATTCCCTGGGAATCCTGCCTATTTAAACACTAAATCTGTCGCAATGGAAACGCGGTGGCTAGGTTGCGCGTTACTACCATATTGGCACCAGATACGCAGTAGAGTAATCGGGAAGTACTGGATGCCATAGTGTAGACAATAGGCCTCTACCAGCGGTGTGTTGTAACGCACATCGCAGCAAC	272	226	0.276961	0.970504	[74]	252
GGACCGAGAAGTTACCCAAAACCTCAATTAGTCACTTAGTGGAGCTGAGGTGAATTGGGAGCTCGCGGGAGCAAACTATCTCGGTCCTGAATTCCTTAGGAATTCTGCCTATTTAAACACTAAATCGGACGTAATAGTAACGCGGTGGCTAGGTTGCGCGTTACTACAAAATTGGCACCTGATATCCAGTTGAGTAATCGGGGAGTACTGGGCGCCAAAGTAAAGACAATAGGCCTCTATCGGCTATGTGATGTAACGCACATCGCAGCAAC	272	262	0.321078	0.968587	[74]
GGACCGAGAAGTTACCCAATATGGTCGACTTCGAATCGAAGAGAAATAGGTCCCGGGAAGCGCGAGGCTCTTACCCCGTCGGTTTGTAATTGCCTTCGGATACTGTTCAGAAGACATCACATTGAGATTTCCCCGCTGTAATATATAGCCCTGCTCAGTCAACCCTTATAGCTGCTGGCACCGGCAGAGGAAATGTTGGACTTACCAGTGAGACCGTCGTCATACACTTGTACAGGATGGCCTTAAGCGGGGTACGGACGCACATCGCAGCAAC	274	247	0.300487	0.969732	[74]
GGGAACUCGAUGAAGCGAAUUCUGUUGGCGAACUGUACGCAAGUACACUGGAUGACAGGCCUAUCUAUCGGAUCCACG	78	48	0.205128	0.908893	[75]	92
GGAGCUCAGCCUUCACUGCCAGACAGUAGAGGGAAGUGUGAGCUAUCACCUCAAGGAAAACGCUUCAGAAAGGGACUUAGGUGAUGAUAGUGUGGCACCACGGUCGGAUCCAC	113	65	0.19174	0.937437	[76]	138
GGGAGAAUUCCGACCAGAAGCUUUGGUUGUCUUGUACGUUCACUGUUACGAUUGUGUUAGGUUUAACUACACUUUGCAAUCGCAUAUGUGCGUCUACAUGGAUCCUCA	108	59	0.182099	0.935389	[77]	108
GGGAGAAUUCCGACCAGAAGCUUCUGGUUAGUUUUGCACAGUGGTCGAUGCUAGACUUGGUUUAGGUAAUGAGUCCAAUAGUCCAUAUGUGCGUCUACAUGGAUCCUCA	109	81	0.247706	0.930382	[77]
GGGAGAAUUCCGACCAGAAGCUUAGUAUAGCGAGGUUUAGCUACACUCGUGCUGAUCGUUUGGUACGGGACCUGCGUGUAGCCCAUAUGUGCGUCUACAUGGAUCCUCA	109	96	0.293578	0.925861	[77]	113
GGGAGCUCAGAAUAAACGCUCAACGUUUAGGACUCCCCCGUUCGUCGAGCGAAUUCGACAUGAGGCCCGGAUCCGGC	77	66	0.285714	0.897347	[78]
GGGAGCUCAGAAUAAACGCUCAAACGUCAUUCCGAGUCGGGUUCGUUCCCCGCUUCGACAUGAGGCCCGGAUCCGGC	77	47	0.203463	0.907947	[78]
GGGAGCUCAGAAUAAACGCUCAACUCCCCGUUAGCGCCUCACUGACGUGUCGAUUCGACAUGAGGCCCGGAUCCGGC	77	80	0.34632	0.887829	[78]
GGGAGCUCAGAAUAAACGCUCAAUGUGUGAGUGGAUCCGUUCCCCGCCUGGUGUUCGACAUGAGGCCCGGAUCCGGC	77	67	0.290043	0.896721	[78]
GGGAGCUCAGAAUAAACGCUCAACAUCACAACUUGUUGUCCUGGUCGAUGUCCUUCGACAUGAGGCCCGGAUCCGGC	77	68	0.294372	0.896087	[78]
GGGAGCUCAGAAUAAACGCUCAAUCGACACAACUCGAUCUCCGUGGCUGUCACUUCGACAUGAGGCCCGGAUCCGGC	77	88	0.380952	0.881554	[78]
GGGAGCUCAGAAUAAACGCUCAAGUCUCACAACUGGCUUAUCCGGUGCGCACGUUCGACAUGAGGCCCGGAUCCGGC	77	76	0.329004	0.890724	[78]
GGGAGCUCAGAAUAAACGCUCAACGAAUCAAUGCGCGGAUCUCAGGAUAUUCGUUCGACAUGAGGCCCGGAUCCGGC	77	97	0.419913	0.873599	[78]	106
GGGAGCUCAGAAUAAACGCUCAAGCGGUAACAUGCUGGAUCUCAGGAAACCGCUUCGACAUGAGGCCCGGAUCCGGC	77	84	0.363636	0.884777	[78]
GGGAGCUCAGAAUAAACGCUCAAGCGGUAACAUGCUGGAUCUCAGGAAACCGUUUCGACAUGAGGCCCGGAUCCGGC	77	69	0.298701	0.895446	[78]
GGGAGCUCAGAAUAAACGCUCAAGUGGAGCUUCGUGACUUGGUCGGAGCCGUGUUCGACAUGAGGCCCGGAUCCGGC	77	58	0.251082	0.902094	[78]
GGGAGCUCAGAAUAAACGCUCAAUGCCACUUUUGUUCGGAUCUUAGGAAGGCAUUCGACAUGAGGCCCGGAUCCGGC	77	66	0.285714	0.897347	[78]
GGGAGCUCAGAAUAAACGCUCAACGUCAGCGGAUCUCCAUUGCGUUAUACGGGUUCGACAUGAGGCCCGGAUCCGGC	77	67	0.290043	0.896721	[78]
GGGAGCUCAGAAUAAACGCUCAAUCCGUGUUGCCACUCCAGUUACUGGACGCCUUCGACAUGAGGCCCGGAUCCGGC	77	53	0.229437	0.904844	[78]
GGGAGCUCAGAAUAAACGCUCAAAGCUGUUGGCAGCGCUGGUGAAGGGAUAGGCUUCGACAUGAGGCCCGGAUCCGGC	78	68	0.290598	0.897916	[78]	99
GGGAGCUCAGAAUAAACGCUCAAUGGACACAACUCCAUUCAUCCCGGGACCGCGUGUUCGACAUGAGGCCCGGAUCCGGC	80	81	0.3375	0.893323	[78]	102
CACUGCCUCGAAAACUGUGAAGAGUACGCUUUAACUGUGCUCCGUGUGGAUUGACCAUAGACCCGUCCCUGGACAGGCACC	81	87	0.358025	0.891223	[79]	99
CACUGCGACAUGGGAAGAGGGAAGAGGGUUGUCGGGAGAUAAUGUCGCGAAACUAAGAACUCUAAGAGCUGCCCGTGGCACC	82	69	0.280488	0.904087	[79]	103
CACUGCGACAUGGGAGGAGGGAAGAGGGUUGUCGGGAGAUAAUGUCGCGAAACUAAGAACUCUAAGAGCUGCCCGUGGCACC	82	67	0.272358	0.905158	[79]
CACUGCGACAUGGGAAGAGGGAAGAGGGUUGUCGGGAGAUAAUGUCGCAAAGCUAAGAACUCUAAGAGCUGCCGCGUGGCACC	83	49	0.196787	0.91508	[79]	96
CACUGCAGCAAUUCGUUGUGCGGGAAUUUGAGGGACGAUGGGGAAGUGGGACGAAUGACUCAUUGCCGCGGUAGGGUUAGGCACC	85	38	0.14902	0.921669	[79]
CACUGCAGCAAUGCGUUGUGUGGGAAUUUGAGGGACGAUGGGGAAGUGGGGACGAAUGACUCAUUGCCGCGGUAGGGUUGGCACC	85	80	0.313725	0.902869	[79]	99
CACUGCUACCUUAGAGUAGGAGCGGGACGAGGGGUUGUUGGGACGUGGGUAUGAUCCAUACAUUAGGAAGCUGGUGAGCUGGCACC	86	96	0.372093	0.895033	[79]
CACUGCUACCUUAGAGUAGGAGCGGGACGAGGGGUUGUUGGGACGUGGGUAUGAUCCAUACAUUAGGAAGCUGGUGAGCUGGCACC	86	96	0.372093	0.895033	[79]	104
CACUGCUACCUUAGAGUAGGAGCGGGACGAGGGGUUGUUGGGACGUGGGUAUGAUCCAUACAUUAGGAAGCUGGUGAGCUGGCACC	86	96	0.372093	0.895033	[79]
UUGAAAUGAGCACAGGUCCGAGUCACAU	28	29	0.345238	0.711434	[8]
UUGAAAGGCCACAUUUCCUGCCCGGUACC	29	38	0.436782	0.674968	[8]	66
AUUUCCCGGCUUUAAUACGUUAUUGACUAA	30	57	0.633333	0.515802	[8]
AAUUCACUUCUCGGCUUUAAUACGUGUAAA	30	53	0.588889	0.568148	[8]
AACUACUUCUCGGCUUUAAUACGUCUCAAA	30	64	0.711111	0.385441	[8]	69
UAUUCACUUCUCGGCUUUAAUACGUGCAAC	30	49	0.544444	0.61028	[8]
UUACACUUCUCGGCUUUAAUACGUCUCAGA	30	60	0.666667	0.467383	[8]
AUCGCACUUCUCGGCUUUAAUACGUGCAAA	30	56	0.622222	0.530043	[8]
AUCGUACUUCUCGGCUUUAAUACGUGCAAA	30	47	0.522222	0.628406	[8]
UUAGACUUCUCGGCUUUAAUACGUCUCAGA	30	45	0.5	0.644922	[8]
UUAAUGCACUUUAACUUCGCGCCCGACCCU	30	50	0.555556	0.600537	[8]
ACACUUGCUGGUGUACGCGCCCCCUUGCGUACUCUGCCCUUCCGCGUCUCCCCGUCCAA	59	65	0.367232	0.850491	[8]	98
ACACUUGCUGGUGUACGCGCCCCCUUGCGUACUCUGCCCUUCCGCGUCUACCCCGUCCAA	60	60	0.333333	0.860344	[8]	105
GGAUACGCGAGCACCUUCUGGCUUAUUAGACUUUCUAAUAUCUGCCCUUCGAGCCCCCAU	60	58	0.322222	0.862634	[8]
GGAUAUGCGAGCACCUUCUGGCUUAUUAGACUUUCUAAUAUCUGCCCUUCGAGCCCUCAU	60	66	0.366667	0.852994	[8]
AGUUACGCGAGCACCUUCUGGCUUAUUAGACUUUCUAAUAUCUGCCCUUCGAGCCCUCAU	60	67	0.372222	0.851693	[8]
AGCUACGCGAGCACCUUCUGGCUUAUUAGACUUUCUAAUAUCUGCCCUUCGAGCCCUCAA	60	52	0.288889	0.869073	[8]
GGAUACGAGAGCACCUUCUGGCUUAUUAGACUUUCUAAUAUCUGCCCUUCGAGCCCCAAU	60	39	0.216667	0.881144	[8]
GAAUACGCGAGCACCUUCUGGCUUAUUAGACUUUCUAAUAUCUGCCCUUCGAGCCCCCAU	60	63	0.35	0.856764	[8]
UACUCUAAGCACCUGCAGUAAAGUAGUUGCGGCACUCCCGGCUCUAAUACGGACACCAUC	60	86	0.477778	0.821716	[8]
UACUCCAAGCUCCGGCGGUAAAGUAGUCGCGGCACUCCCGGCUUUAAUGCGGACAUCAUC	60	50	0.277778	0.871087	[8]
UACUCUAAUCUCCGGCACUAAAGUAGUCGCGGCACUCCCGGCUCUAAUACGGACAUCAUC	60	89	0.494444	0.815839	[8]
UUCACCCACUCCGGGUGCGGUGUGCCCAAACCUCUUCCUACGCCGCAUUAGCCUAAGCAU	60	82	0.455556	0.828993	[8]
GACGAACUCACACGAGUUCUAUCCACUGGAAAUAACAGGACCCUGCAACC	50	58	0.386667	0.81958	[80]
CGAGGCAUAACACUGUCUGGCACGGGAAAUAACAGGACCCCACAAUACCC	50	83	0.553333	0.75226	[80]	96
GGGAGGACGATGCGGACUAGCCUCAUCAGCUCAUGUGCCCCUCCGCCUGGAUCACCAGACGACTCGCTGAGGATCCGAGA	80	82	0.341667	0.892648	[81]	91
GGGAGGACGATGCGGUGACCAAGCCUCACGUUGAACCUGCCAGUAGACCCCGCCCACAGACGACTCGCTGAGGATCCGAGA	81	58	0.238683	0.908274	[81]	96
GGGAUCUCGACCGCUUCGGCGGACGAAUCC	30	30	0.333333	0.733691	[82]	33
GGGAUGAGAAAGAUCGGAAACGAUCAAACCUCAUCCC	37	42	0.378378	0.764234	[82]	43
GGGAUGAGAAAGAUCGGAAACGAUGAAUGAAUCAUCCC	38	45	0.394737	0.763755	[82]	56
GGGAGUUUGGCCGAGCGGUCUAAGGCGCCCGACUCGAGAAAGAUCUCGACCGCAGCACGCACAUCUAGUGGUUGUGUGGUUGACGAUCAAACCUCUGAGGUCCCCGUUCGAUUUACUCCCUGGGCCCGCCUCGCGUGGACCACUCCGCCCCGCUGUGGGAGAAAUCGGGUUUGCCUGAGUUCGAAUCUCAGAGCUCCCACCA	202	155	0.255776	0.961556	[82]	200
GGGAGUUUGGCCGAGCGGUCUAAGGCGCCCGACUCGAGAAAGAUCUCGACCGCAGCCACGCGUGACGUCGAAAUAGCGGUAUCGGAUGAAUGAAUCGAGUCUAACCUGCGCCUUCCCUAAGGCCUCAUGACGUCAAGUUAUAGGCCCGUGUUCCGCUGUGGGAGAAAUCGGGUUUGCCUGAGUUCGAAUCUCAGAGCUCCCACCA	205	161	0.261789	0.961802	[82]	199
GGGAGUUUGGCCGAGCGGUCUAAGGCGCCCGACUCGAGAAAGAUCUCGACCGCAGGGACAUGCGUUUGCCGUGGAUGCCGCGCUAACCCCUGCUAAAGUAGUGUUCAGCUCGACGAUAGCAUCUCUAACUCGCCUUCCCUUCCACCCGCCCCCCCGCUGUGGGAGAAAUCGGGUUUGCCUGAGUUCGAAUCUCAGAGCUCCCACCA	206	115	0.186084	0.965521	[82]
GGGAGUUUGGCCGAGCGGUCUAAGGCGCCCGACUCGAGAAAGAUCUCGACCGCAGACCCAUCCAUGCUUUGCCACCAUCUAUCUCGCGGUCUAUCACCACCUUAGAUCGAGAACCUUGUUUACGCUGUUGGCACUUCCUAGUCCGGUCUCCGCCCGCUGUGGGAGAAAUCGGGUUUGCCUGAGUUCGAAUCUCAGAGCUCCCACCA	206	133	0.21521	0.964241	[82]	225
GGGAGUUUGGCCGAGCGGUCUAAGGCGCCCGACUCGAGAAAGAUCUCGACCGCAGCACGAAGCAAUACUGUUGUGUUGUGUCGGAUUAAUCCUCUGUUCUGUGGCUGCACCGCUCAACGAGUUUCACCACCGCGCUCCGCCUGUUUGUGCGUGGCCGCUGUGGGAGAAAUCGGGUUUGCCUGAGUUCGAAUCUCAGAGCUCCCACCA	207	172	0.276973	0.961372	[82]
GGGAGUUUGGCCGAGCGGUCUAAGGCGCCCGACUCGAGAAAGAUCUCGACCGCAGGGGCAUCAGCGCUCCGGGUUGAUGGUUACAACUGGAUUCGGCCGCCUUGAACAUGCUCUCGUCCCAGCUAUGUGCUUGGCGAUAGUCCCCACUGUGCGCCCGCUGUGGGAGAAAUCGGGUUUGCCUGAGUUCGAAUCUCAGAGCUCCCACCA	207	176	0.283414	0.961025	[82]	185
GGGAGUUUGGCCGAGCGGUCUAAGGCGCCCGACUCGAGAAAGAUCUCGACCGCAGGGGCACCCAUUCCUGUACACGAGAUGAAUGAUCCGAAUCGAUGCAGCCCUCGACCUCGUGGAACUUGUUCCACAGUAAGCCGUCCCACUUCACCGGUCCCCCGCUGUGGGAGAAAUCGGGUUUGCCUGAGUUCGAAUCUCAGAGCUCCCACCA	208	201	0.322115	0.958995	[82]	228
GGGAGAGACCTGCCATTCACGCTGGATAAAACTTCACAGCCATACGTTGTGTTTGACTAAGCCAGAATATCCAGATAAGGTAGCTGGAGAGAGCAGCGACTTACATCCCCGGTAGATACGAACAGGACCCCTGCCATGCAGTGACCTTTCGTAGCCGCCAGTTCTTGACCTCTTTCGTCGCAGTCCTAGGCAC	193	127	0.219344	0.961667	[83]
GGGAGAGACCTGCCATTCACGCTGGATAAAACTTCACTGCCATACGTTGTGTTTGACTAAGCCAGAGTATCCAGATAAGGTAGCTGGAGAGAGCAGCGACTTACATCCCCGGTAGATGCGAACAGGACCCCTGCCATGCAGTGACCTTTCGTAGCTACCAGTTCTTGACCTCTTTCGTCGCAGTCCTAGGCAC	193	192	0.331606	0.955229	[83]	204
GGGAGAGACCTGCCATTCACCCTGGATAAAACTTCACTGCCATACGTTGTGTTTGACTAAGCCAGAATATCCAGATAAGGTAGCTGGAGAGAGCAGCGACTTACATCCCCGGTAGATGCGAACAGGGCCCCTGCCATGCAGTGACCTTTCGTAGCCGCCAGTTCTTGACCTCTTTCGTCGCAGTCCTAGGCAC	193	136	0.234888	0.960889	[83]
GGGAGAGACCTGCCATTCACCCTGGATAAAACTTCACTGCCATACGTTGTGTTTGACTAAGCCAGAATATCCAGATAAGGTAGCTGGAGGGAGCAGCGACTTACATCCCCGGTAGATGCGAACAGGACCCCTGCCATGCAGTGACCTTTCGTAGCCGCCAGTTCTTGACCTCTTTCGTCGCAGTCCTAGGCAC	193	78	0.134715	0.965416	[83]
GGGAGAGACCTGCCATTCACCCTGGATAAAACTTCACTGCCATACGTTGTGTTTGACTAAGCCAGAGTATCCAGATAAGGTAGCTGGAGAGAGCAGCGACTTACATCCCCGGCAGATGCGAACAGGACCCCTGCCATGCAGTGACCTTTCGTAGCCGCCAGTTCTTGACCTCTTTCGTCGCAGTCCTAGGCAC	193	166	0.286701	0.958048	[83]
GGCGCACGGUUGGUUGGGGCGUGAUAUUAGGCGCC	35	29	0.27619	0.78689	[9]	45
GGACGGCCCUUGCGGCCGCCAAGAAGCUCCAGAAGGAUGUUGCCACGGUUGGUUGGGGCGUGAUAUUAGGGCGCGCCUUCGGGAGC	86	70	0.271318	0.90955	[9]	91

## Sheet: References
Citation	Source
1	Beaudry, A., DeFoe, J., Zinnen, S., Burgin, A. & Beigelman, L. In vitro selection of a novel nuclease-resistant RNA phosphodiesterase. Chemistry & Biology 7, 323-334 (2000).
2	Bell, S. D., Denu, J. M., Dixon, J. E. & Ellington, A. D. RNA Molecules That Bind to and Inhibit the Active Site of a Tyrosine Phosphatase. J. Biol. Chem. 273, 14309-14314, doi:10.1074/jbc.273.23.14309 (1998).
3	Berens, C., Thain, A. & Schroeder, R. A tetracycline-binding RNA aptamer. Bioorganic & Medicinal Chemistry 9, 2549-2556, doi:http://dx.doi.org/10.1016/S0968-0896(01)00063-3 (2001).
4	Bridonneau, P. et al. High-Affinity Aptamers selectively inhibit human nonpancreatic secretory phospholipase A2 (hnps-PLA2). Journal of Medicinal Chemistry 41, 778-786, doi:10.1021/jm970579k (1998).
5	Brockstedt, U., Uzarowska, A., Montpetit, A., Pfau, W. & Labuda, D. In vitro evolution of RNA aptamers recognizing carcinogenic aromatic amines. Biochemical and Biophysical Research Communications 313, 1004-1008 (2004).
6	Cerchia, L. et al. Neutralizing aptamers from whole-cell SELEX inhibit the RET receptor tyrosine kinase. PLoS Biol 3, e123, doi:10.1371/journal.pbio.0030123 (2005).
7	Chen, C.-h. B., Chernis, G. A., Hoang, V. Q. & Landgraf, R. Inhibition of heregulin signaling by an aptamer that preferentially binds to the oligomeric form of human epidermal growth factor receptor-3. PNAS 100, 9226-9231, doi:10.1073/pnas.1332660100 (2003).
8	Coleman, T. M. & Huang, F. RNA-catalyzed thioester synthesis. Chemistry & Biology 9, 1227-1236 (2002).
9	Conn, M. M., Prudent, J. R. & Schultz, P. G. Porphyrin metalation catalyzed by a small RNA molecule. J. Am. Chem. Soc. 118, 7012-7013, doi:10.1021/ja961249c (1996).
10	Conrad, R., Keranen, L. M., Ellington, A. D. & Newton, A. C. Isozyme-specific inhibition of protein kinase C by RNA aptamers. J. Biol. Chem. 269, 32051-32054 (1994).
11	Conrad, R. & Ellington, A. D. Detecting immobilized protein kinase C isozymes with RNA aptamers. Analytical Biochemistry 242, 261-265, doi:http://dx.doi.org/10.1006/abio.1996.0462 (1996).
12	Cox, J. C., Rudolph, P. & Ellington, A. D. Automated RNA selection. Biotechnology Progress 14, 845-850, doi:10.1021/bp980097h (1998).
13	Cox, J. C. & Ellington, A. D. Automated selection of anti-Protein aptamers. Bioorganic & Medicinal Chemistry 9, 2525-2531, doi:http://dx.doi.org/10.1016/S0968-0896(01)00028-1 (2001).
14	Daniels, D. A., Chen, H., Hicke, B. J., Swiderek, K. M. & Gold, L. A tenascin-C aptamer identified by tumor cell SELEX: Systematic evolution of ligands by exponential enrichment. PNAS 100, 15416-15421, doi:10.1073/pnas.2136683100 (2003).
15	Eulberg, D., Buchner, K., Maasch, C. & Klussmann, S. Development of an automated in vitro selection protocol to obtain RNA-based aptamers: identification of a biostable substance P antagonist. Nucleic Acids Research 33, e45, doi:10.1093/nar/gni044 (2005).
16	Fukuda, K. et al. Isolation and characterization of RNA aptamers specific for the hepatitis C virus nonstructural protein 3 protease. European Journal of Biochemistry 267, 3685-3694, doi:10.1046/j.1432-1327.2000.01400.x (2000).
17	Fusz, S., Eisenführ, A., Srivatsan, S. G., Heckel, A. & Famulok, M. A ribozyme for the aldol reaction. Chemistry & Biology 12, 941-950 (2005).
18	Gal, S. W. et al. Selection of a RNA aptamer that binds to human activated protein C and inhibits its protease function. European Journal of Biochemistry 252, 553-562, doi:10.1046/j.1432-1327.1998.2520553.x (1998).
19	Gebhardt, K., Shokraei, A., Babaie, E. & Lindqvist, B. H. RNA aptamers to S-adenosylhomocysteine: Kinetic properties, divalent cation dependency, and comparison with anti-S-adenosylhomocysteine antibody. Biochemistry 39, 7255-7265, doi:10.1021/bi000295t (2000).
20	Geiger, A., Burgstaller, P., von der Eltz, H., Roeder, A. & Famulok, M. RNA aptamers that bind l-arginine with sub-micromolar dissociation constants and high enantioselectivity. Nucleic Acids Research 24, 1029-1036, doi:10.1093/nar/24.6.1029 (1996).
21	Gening, L. V., Klincheva, S. A., Reshetnjak, A., Grollman, A. P. & Miller, H. RNA aptamers selected against DNA polymerase β inhibit the polymerase activities of DNA polymerases β and κ. Nucleic Acids Research 34, 2579-2586, doi:10.1093/nar/gkl326 (2006).
22	Hager, A.J. & Szostak, J.W. Isolation of novel ribozymes that ligate AMP-activated RNA substrates. Chemistry & Biology 4, 607-617 (1997).
23	Haller, A.A. & Sarnow, P. In vitro selection of a 7-methyl-guanosine binding RNA that inhibits translation of capped mRNA molecules. Proceedings of the National Academy of Sciences 94, 8521-8526 (1997).
24	Hamm, J., Huber, J. & Lührmann, R. Anti-idiotype RNA selected with an anti-nuclear export signal antibody is actively transported in oocytes and inhibits Rev- and cap-dependent RNA export. Proceedings of the National Academy of Sciences 94, 12839-12844 (1997).
25	Hartmann, R. et al. Activation of 2′-5′ Oligoadenylate Synthetase by Single-stranded and Double-stranded RNA Aptamers. Journal of Biological Chemistry 273, 3236-3246 (1998).
26	Hesselberth, J.R., Miller, D., Robertus, J. & Ellington, A.D. In vitro selection of RNA molecules that Inhibit the activity of ricin A-chain. Journal of Biological Chemistry 275, 4937-4942 (2000).
27	Hirao, I., Spingola, M., Peabody, D. & Ellington, A. The limits of specificity: An experimental analysis with RNA aptamers to MS2 coat protein variants. Molecular Diversity 4, 75-89 (1998).
28	Hirao, I. et al. In vitro selection of RNA aptamers that bind to colicin E3 and structurally resemble the decoding site of 16S ribosomal RNA. Biochemistry 43, 3214-3221 (2004).
29	Hornung, V., Hofmann, H.-P. & Sprinzl, M. In vitro selected RNA molecules that bind to elongation factor Tu. Biochemistry 37, 7260-7267 (1998).
30	Huang, F. & Yarus, M. 5‘-RNA self-capping from guanosine diphosphate. Biochemistry 36, 6557-6563 (1997).
31	Huang, F., Bugg, C.W. & Yarus, M. RNA-catalyzed CoA, NAD, and FAD synthesis from phosphopantetheine, NMN, and FMN. Biochemistry 39, 15548-15555 (2000).
32	Li, N. & Huang, F. Ribozyme-catalyzed aminoacylation from CoA thioesters. Biochemistry 44, 4582-4590 (2005).
33	Hwang, B. & Lee, S.-W. Improvement of RNA aptamer activity against myasthenic autoantibodies by extended sequence selection. Biochemical and Biophysical Research Communications 290, 656-662 (2002).
34	Illangasekare, M. & Yarus, M. Specific, rapid synthesis of Phe-RNA by RNA. Proceedings of the National Academy of Sciences 96, 5470-5475 (1999).
35	Illangasekare, M. & Yarus, M. A tiny RNA that catalyzes both aminoacyl-tRNA and peptidyl-RNA synthesis. RNA 5, 1482-1489 (1999).
36	Jadhav, V.R. & Yarus, M. Acyl-CoAs from coenzyme ribozymes. Biochemistry 41, 723-729 (2002).
37	Jayasena, V.K. & Gold, L. In vitro selection of self-cleaving RNAs with a low pH optimum. Proceedings of the National Academy of Sciences 94, 10612-10617 (1997).
38	Jenne, A. & Famulok, M. A novel ribozyme with ester transferase activity. Chemistry & Biology 5, 23-34 (1998).
39	Jeong, S., Eom, T.-Y., Kim, S.-J., Lee, S.-W. & Yu, J. In vitro selection of the RNA aptamer against the sialyl Lewis X and its inhibition of the cell adhesion. Biochemical and Biophysical Research Communications 281, 237-243 (2001).
40	Jones, L.A., Clancy, L.E., Rawlinson, W.D. & White, P.A. High-affinity aptamers to subtype 3a hepatitis C virus polymerase display genotypic specificity. Antimicrob Agents Chemother 50, 3019-27 (2006).
41	Katahira, M. et al. Structural study of an RNA aptamer for a Tat protein complexed with ligands. Nucleic Acids Symposium Series 42, 269-270 (1999).
42	Khvorova, A., Kwak, Y.-G., Tamkun, M., Majerfeld, I. & Yarus, M. RNAs that bind and change the permeability of phospholipid membranes. Proceedings of the National Academy of Sciences 96, 10649-10654 (1999).
43	Kikuchi, K. et al. A hepatitis C virus (HCV) internal ribosome entry site (IRES) domain III-IV-targeted aptamer inhibits translation by binding to an apical loop of domain IIId. Nucleic Acids Res 33, 683-92 (2005).
44	Kim, S.J., Kim, M.Y., Lee, J.H., You, J.C. & Jeong, S. Selection and stabilization of the RNA aptamers against the Human Immunodeficiency Virus Type-1 nucleocapsid protein. Biochemical and Biophysical Research Communications 291, 925-931 (2002).
45	Kimoto, M. et al. Anti-(Raf-1) RNA aptamers that inhibit Ras-induced Raf-1 activation. European Journal of Biochemistry 269, 697-704 (2002).
46	Koizumi, M. & Breaker, R.R. Molecular recognition of cAMP by an RNA aptamer. Biochemistry 39, 8983-8992 (2000).
47	Kumar, P.K.R. et al. Isolation of RNA aptamers specific to the NS3 protein of hepatitis C virus from a pool of completely random RNA. Virology 237, 270-282 (1997).
48	Kumar, R.K. & Yarus, M. RNA-catalyzed amino acid activation. Biochemistry 40, 6998-7004 (2001).
49	Lee, S.K., Park, M.W., Yang, E.G., Yu, J. & Jeong, S. An RNA aptamer that binds to the β-catenin interaction domain of TCF-1 protein. Biochemical and Biophysical Research Communications 327, 294-299 (2005).
50	Legiewicz, M. & Yarus, M. A more complex isoleucine aptamer with a cognate triplet. Journal of Biological Chemistry 280, 19815-19822 (2005).
51	Lorger, M., Engstler, M., Homann, M. & Göringer, H.U. Targeting the variable surface of African trypanosomes with variant surface glycoprotein-specific, serum-stable RNA pptamers. Eukaryotic Cell 2, 84-94 (2003).
52	Lupold, S.E., Hicke, B.J., Lin, Y. & Coffey, D.S. Identification and characterization of nuclease-stabilized RNA molecules that bind human prostate cancer cells via the prostate-specific membrane antigen. Cancer Research 62, 4029-4033 (2002).
53	Mannironi, C., Scerch, C., Fruscoloni, P. & Tocchini-Valentini, G.P. Molecular recognition of amino acids by RNA aptamers: The evolution into an L-tyrosine binder of a dopamine-binding RNA motif. RNA 6, 520-527 (2000).
54	Meli, M., Vergne, J., Décout, J.L. & Maurel, M.-C. Adenine-Aptamer Complexes. A bipartite RNA site which binds the adenine nucleic base. Journal of Biological Chemistry 277, 2104-2111 (2002).
55	Missailidis, S., Thomaidou, D., Borbas, K.E. & Price, M.R. Selection of aptamers with high affinity and high specificity against C595, an anti-MUC1 IgG3 monoclonal antibody, for antibody targeting. Journal of Immunological Methods 296, 45-62 (2005).
56	Miyakawa, S. et al. RNA aptamers to mammalian initiation factor 4G inhibit cap-dependent translation by blocking the formation of initiation factor complexes. RNA 12, 1825-1834 (2006).
57	Murphy, M.B., Fuller, S.T., Richardson, P.M. & Doyle, S.A. An improved method for the in vitro evolution of aptamers and applications in protein detection and purification. Nucleic Acids Research 31, e110 (2003).
58	Ogawa, A., Tomita, N., Kikuchi, N., Sando, S. & Aoyama, Y. Aptamer selection for the inhibition of cell adhesion with fibronectin as target. Bioorganic & Medicinal Chemistry Letters 14, 4001-4004 (2004).
59	Piganeau, N., Thuillier, V. & Famulok, M. In vitro selection of allosteric ribozymes: theory and experimental validation. Journal of Molecular Biology 312, 1177-1190 (2001).
60	Ryu, Y., Kim, K.-J., Roessner, C.A. & Scott, A.I. Decarboxylative Claisen condensation catalyzed by in vitro selected ribozymes. Chemical Communications, 1439-1441 (2006).
61	Saito, H., Kourouklis, D. & Suga, H. An in vitro evolved precursor tRNA with aminoacylation activity. The EMBO Journal 20, 1797-1878 (2001).
62	Schürer, H. et al. Aptamers that bind to the antibiotic moenomycin A. Bioorganic & Medicinal Chemistry 9, 2557-2563 (2001).
63	Seelig, B. & Jäschke, A. A small catalytic RNA motif with Diels-Alderase activity. Chemistry & Biology 6, 167-176 (1999).
64	Seiwert, S.D., Stines Nahreini, T., Aigner, S., Ahn, N.G. & Uhlenbeck, O.C. RNA aptamers as pathway-specific MAP kinase inhibitors. Chemistry & Biology 7, 833-843 (2000).
65	Sengle, G., Eisenfuhr, A., Arora, P.S., Nowick, J.S. & Famulok, M. Novel RNA catalysts for the Michael reaction. Chem Biol 8, 459-73 (2001).
66	Soukup, G.A., Emilsson, G.A.M. & Breaker, R.R. Altering molecular recognition of RNA aptamers by allosteric selection. Journal of Molecular Biology 298, 623-632 (2000).
67	Sun, L., Cui, Z., Gottlieb, R.L. & Zhang, B. A selected ribozyme catalyzing diverse dipeptide synthesis. Chem. Biol. 9, 619-628 (2002).
68	Tahiri-Alaoui, A. et al. High affinity nucleic acid aptamers for streptavidin incorporated into bi-specific capture ligands. Nucleic Acids Research 30, e45 (2002).
69	Tang, J. & Breaker, R.R. Structural diversity of self-cleaving ribozymes. Proceedings of the National Academy of Sciences of the USA 97, 5784–5789 (2000).
70	Thomas, M. et al. Selective targeting and inhibition of yeast RNA polymerase II by RNA aptamers. Journal of Biological Chemistry 272, 27980-27986 (1997).
71	Tok, J.B.-H., Cho, J. & Rando, R.R. RNA aptamers that specifically bind to a 16S ribosomal RNA decoding region construct. Nucleic Acids Research 28, 2902-2910 (2000).
72	Tuschl, T., Sharp, P.A. & Bartel, D.P. Selection in vitro of novel ribozymes from a partially randomized U2 and U6 snRNA library. The EMBO Journal 17, 2637-2650 (1998).
73	Ulrich, H. et al. In vitro selection of RNA molecules that displace cocaine from the membrane-bound nicotinic acetylcholine receptor. Proceedings of the National Academy of Sciences 95, 14051-14056 (1998).
74	Unrau, P.J. & Bartel, D.P. RNA-catalysed nucleotide synthesis. Nature 395, 260-3. (1998).
75	Urvil, P.T. et al. Selection of RNA aptamers that bind specifically to the NS3 protease of hepatitis C virus. European Journal of Biochemistry 248, 130-138 (1997).
76	Wallace, S.T. & Schroeder, R. In vitro selection and characterization of streptomycin-binding RNAs: recognition discrimination between antibiotics. RNA 4, 112-123 (1998).
77	Wang, Y., Killian, J., Hamasaki, K. & Rando, R.R. RNA molecules that specifically and stoichiometrically bind aminoglycoside antibiotics with high affinities. Biochemistry 35, 12338-12346 (1996).
78	Wecker, M., Smith, D. & Gold, L. In vitro selection of a novel catalytic RNA: characterization of a sulfur alkylation reaction and interaction with small peptide. RNA 2, 982-994 (1996).
79	Weiss, S. et al. RNA aptamers specifically interact with the prion protein PrP. Journal of Virology 71, 8790-7 (1997).
80	Welch, M., Majerfeld, I. & Yarus, M. 23S rRNA similarity from selection for peptidyl transferase mimicry. Biochemistry 36, 6614-6623 (1997).
81	White, R.R. et al. Inhibition of rat corneal angiogenesis by a nuclease-resistant RNA aptamer specific for angiopoietin-2. Proceedings of the National Academy of Sciences 100, 5028-5033 (2003).
82	Williams, K.P., Ciafre, S. & Tocchini-Valentini, G.P. Selection of novel Mg2+-dependent self-cleaving ribozymes. The EMBO Journal 14, 4551-7 (1995).
83	Zhang, B. & Cech, T.R. Peptide bond formation by in vitro selected ribozymes. Nature 390, 96-100 (1997).
